# Supplementary material
Source: publisher site journal article supplement (https://www.spandidos-publications.com/6030/downloadSupplementary)
Supplement: Supplementary file 1 [file downloadSupplementary]

## Sheet: basal_up_SAHA_vs_con
Supplementary Table V: Upregulated genes in basal-like cell lines (PaTu-T, PANC-1, MIAPaCa-2) after 24h SAHA (0.5µM) treatment compared to control-treated cell lines
n=25	BaseMean	log2Fold Change	lFCSE	Stat	P-value	Padj	Symbol
ENSG00000262700	0.636278	17.9854	3.99957	4.49683	6.89743e-06	0.0307161	AC133552.3
ENSG00000233645	0.47814	17.1055	4.02982	4.24473	2.18854e-05	0.0307161	AL358876.2
ENSG00000273338	0.47814	17.1055	4.02982	4.24473	2.18854e-05	0.0307161	AC103591.3
ENSG00000236790	0.47814	17.1055	4.02982	4.24473	2.18854e-05	0.0307161	LINC00299
ENSG00000173302	0.47814	17.1055	4.02982	4.24473	2.18854e-05	0.0307161	GPR148
ENSG00000276407	0.47814	17.1055	4.02982	4.24473	2.18854e-05	0.0307161	AC024559.2
ENSG00000249647	0.47814	17.1055	4.02982	4.24473	2.18854e-05	0.0307161	C5orf66-AS2
ENSG00000286498	0.47814	17.1055	4.02982	4.24473	2.18854e-05	0.0307161	AL132982.1
ENSG00000164651	0.47814	17.1055	4.02982	4.24473	2.18854e-05	0.0307161	SP8
ENSG00000186288	0.47814	17.1055	4.02982	4.24473	2.18854e-05	0.0307161	PABPC1L2A
ENSG00000228317	0.47814	17.1055	4.02982	4.24473	2.18854e-05	0.0307161	AL158070.1
ENSG00000228353	0.47814	17.1055	4.02982	4.24473	2.18854e-05	0.0307161	AL450322.1
ENSG00000256658	0.47814	17.1055	4.02982	4.24473	2.18854e-05	0.0307161	AC008115.1
ENSG00000249753	0.47814	17.1055	4.02982	4.24473	2.18854e-05	0.0307161	AC084357.2
ENSG00000178882	0.47814	17.1055	4.02982	4.24473	2.18854e-05	0.0307161	RFLNA
ENSG00000287739	0.47814	17.1055	4.02982	4.24473	2.18854e-05	0.0307161	AC009019.2
ENSG00000261367	0.47814	17.1055	4.02982	4.24473	2.18854e-05	0.0307161	AC012645.2
ENSG00000262500	0.47814	17.1055	4.02982	4.24473	2.18854e-05	0.0307161	MAPK8IP1P1
ENSG00000265971	0.47814	17.1055	4.02982	4.24473	2.18854e-05	0.0307161	AC005828.5
ENSG00000273287	0.47814	17.1055	4.02982	4.24473	2.18854e-05	0.0307161	AL008718.2
ENSG00000196972	1.40594	16.1614	3.98026	4.06039	4.89913e-05	0.0634701	SMIM10L2B
ENSG00000287759	0.831041	15.8089	3.99332	3.95883	7.53175e-05	0.0845665	AL353151.2
ENSG00000284471	0.831041	15.8089	3.99332	3.95883	7.53175e-05	0.0845665	CR769775.2
ENSG00000257859	0.927802	15.7541	3.99027	3.94812	7.87686e-05	0.0855884	CASC18
ENSG00000100626	40.3943	2.65922	0.675509	3.93661	8.26395e-05	0.0869884	GALNT16
